# Supplementary material for: MicroRNA-410-3p Binds to TLR2 and Alleviates Myocardial Mitochondrial Dysfunction and Chemokine Production in LPS-Induced Sepsis
Source: PubMed Central journal article supplement — Mol Ther Nucleic Acids. 2020 Jul 25;22:273–84. doi: 10.1016/j.omtn.2020.07.031 (PMC7516191; doi:10.1016/j.omtn.2020.07.031), 2020-07-25
Supplement: mmc1.pdf [file mmc1.pdf]

**OMTN, Volume 22**

**Supplemental Information**

**MicroRNA-410-3p Binds to TLR2 and Alleviates  
Myocardial Mitochondrial Dysfunction  
and Chemokine Production in LPS-Induced Sepsis**

**Tongkun Zuo, Qing Tang, Xiangcheng Zhang, and Futai Shang**

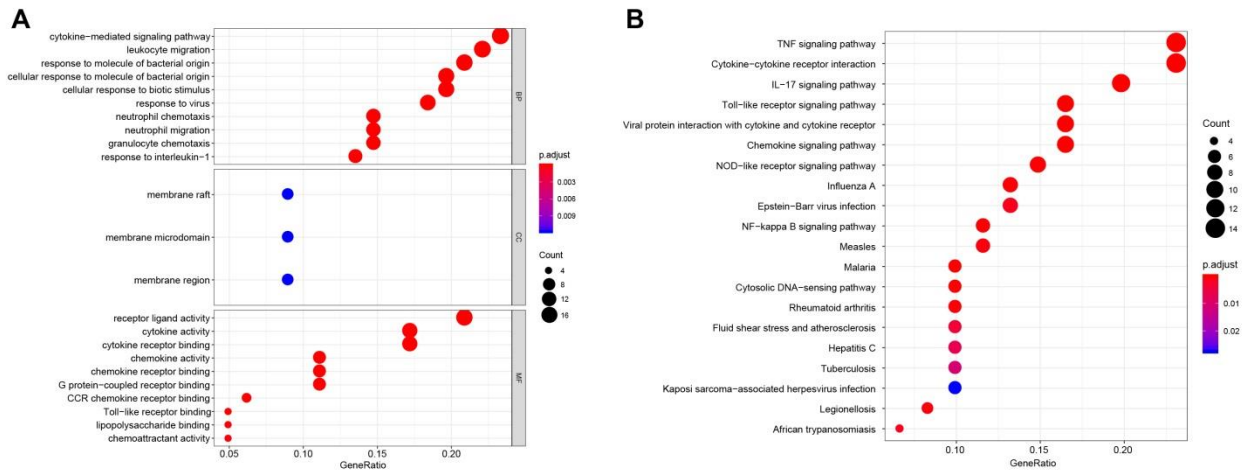

**Supplementary Figure 1.** GO enrichment (A) and KEGG pathway analysis (B) of differentially expressed genes. GO, Gene Ontology; KEGG, Kyoto Encyclopedia of Genes and Genomes
